# Supplementary figures and images for: Phytochemical Characterization, Antioxidant and In Vitro Cytotoxic Activity Evaluation of Juniperus oxycedrus Subsp. oxycedrus Needles and Berries
Source: MDPI journal article supplement (doi:10.3390/molecules24030502), 2019-01-30

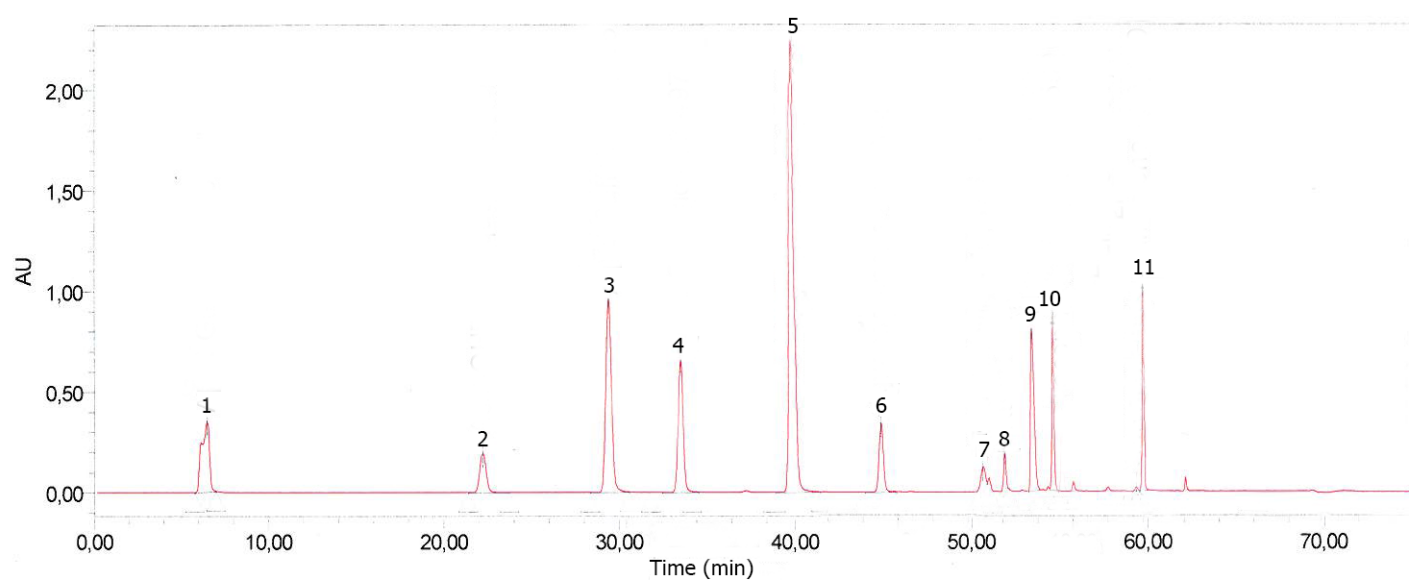

Supplement: s1 [file s1]
